# Supplementary material for: Lipid-induced insulin resistance mediated by the proinflammatory receptor TLR4 requires saturated fatty acid–induced ceramide biosynthesis in mice
Source: JCI journal article supplement (doi:10.1172/jci43378), 2011-04-13
Supplement: sd1 [file 1]

**Supplemental Figure 1**

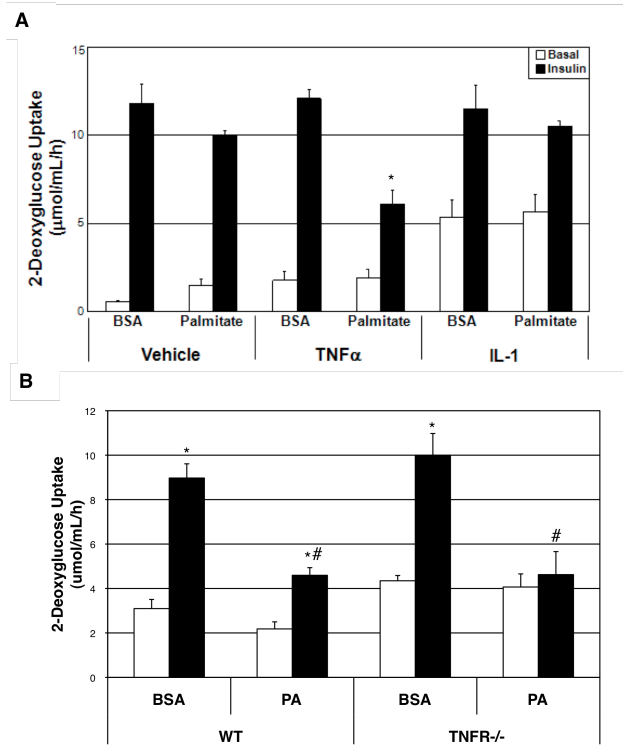

**Supplemental Figure 1.** Effects of palmitate and inflammatory mediators on muscle glucose uptake. 2-deoxyglucose uptake was quantified in the presence (black bars) or absence (white bars) of insulin (300 mU/mL). **(A)** The effect of inflammatory cytokines on hexose uptake. Soleus muscles from adult male mice were incubated for 6 hours in the presence of palmitate (PA; 0.5 mM) or BSA alone. TNF $\alpha$  (20ng/mL), IL-1 (20ng/mL) or vehicle was included for the duration of the 6 hour incubation. **(B)** The effect of palmitate on hexose uptake in TNF $\alpha$  receptor null mice. Soleus muscles from adult male mice were incubated for 6 hours in the presence of palmitate (0.5 mM) or BSA alone. Values expressed as mean  $\pm$  SEM (n=4). \*P<0.05 for insulin stimulation versus BSA control. # P<0.05 for insulin stimulation with palmitate versus BSA+insulin.

**Supplemental Figure 2**

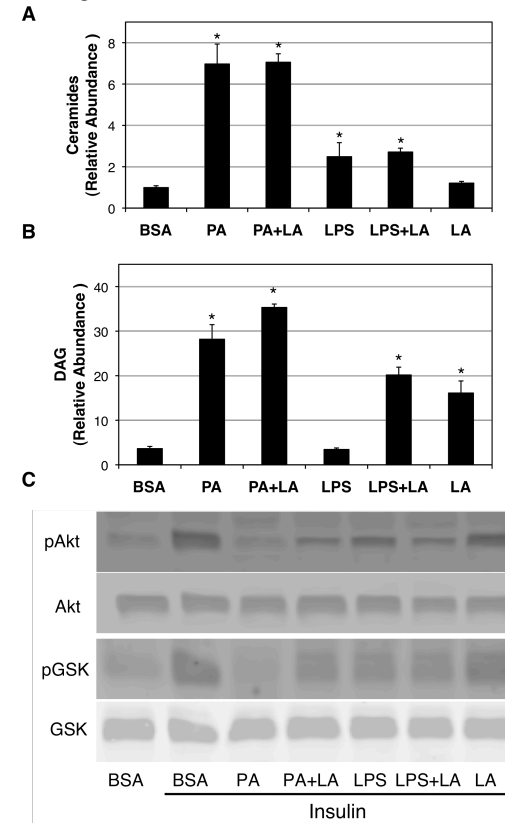

**Supplemental Figure 2.** LPS and palmitate elicit an increase in ceramide synthesis in C<sub>2</sub>C<sub>12</sub> myotubes. Cultured myotubes treated with palmitate (PA; 0.75 mM) and lipopolysaccharide (LPS; 1ug/ml) for 12 h accumulate ceramide and addition of unsaturated linoleic acid (LA; 0.75 mM) had little or no effect **(A)**. Levels of diacylglycerol were elevated in each condition that included PA or LA but not LPS alone **(B)**. Similarly, insulin signaling at the level of Akt and its substrate, GSK3 $\beta$ , was reduced in the presence of PA and LPS and inclusion of LA into both incubations had little effect **(C)**. Values expressed as mean  $\pm$  SEM (n=4). \*P<0.05 for treatment versus BSA control.

| <b>Gene</b>           | <b>Sequence</b>               |
|-----------------------|-------------------------------|
|                       | 5'-TGGCATTGTTACCAACTGGG       |
| <i>β-actin (actb)</i> | 5'-GGGTCATCTTTTCACGGTTG       |
|                       | 5'-TACTCAGAGACCTCCAGCTG       |
| <i>SPT1 (sptlc1)</i>  | 5'-CACCAGGGATATGCTGTCATC      |
|                       | 5'-GGAGATGCTGAAGCGGAAC        |
| <i>SPT2 (sptlc2)</i>  | 5'-GTATGAGCTGCTGACAGGCA       |
|                       | 5'-CTGTTCTACTTGGCCTGTTG       |
| <i>CerS1 (lass1)</i>  | 5'-TCATGCAGGAAGAACACGAG       |
|                       | 5'-TCTTCTCAAAAAGTTCCGAG       |
| <i>CerS2 (lass2)</i>  | 5'-AGTGATGATGAAAACGAATGG      |
|                       | 5'-TGTCGTTCCAGCTTGAGTGAG      |
| <i>CerS4 (lass4)</i>  | 5'-AGCAGGCTTCACAGAATTC        |
|                       | 5'-CTCCAACGCTCACGAAATTC       |
| <i>CerS5 (lass5)</i>  | 5'-ATGCAGACAGAAGATGAGTG       |
|                       | 5'-GTTCCGGAGCATTCAACGCTG      |
| <i>CerS6 (lass6)</i>  | 5'-CTGAGTCGTGAAGACAGAGG       |
|                       | 5'-CACCGGTACCTCGGAGCGGA       |
| <i>Des1</i>           | 5'-GTTTGGGATTGATGAACAGGGGT    |
|                       | 5'-GCCTGTAGCCCACGTCGTAGC      |
| <i>TNF</i>            | 5'-CGGGGCAGCCTTGCCCTTG        |
|                       | 5'-TCTGGAGTACCATAGCTACCTGGAGT |
| <i>IL-6 (il6)</i>     | 5'-GGAGAGCATTGGAAATTGGGGTAGGA |

**Supplemental Table 1.** Primers used in qRT-PCR.
